# Supplementary material for: High-resolution boundary conditions of an old ice target near Dome C, Antarctica
Source: Copernicus journal article supplement (doi:10.5194/tc-11-1897-2017), 2017-08-14
Supplement: Supplementary file 2 [file tc-11-1897-2017-supplement.zip]

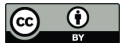

## *Supplement of*

# **High-resolution boundary conditions of an old ice target near Dome C, Antarctica**

**Duncan A. Young et al.**

*Correspondence to:* Duncan A. Young ([duncan@ig.utexas.edu](mailto:duncan@ig.utexas.edu))

- tc-11-1897-2017-supplement-title-page.pdf
- SupplementaryData
  - .DS\_Store
  - AWI
    - \* bedelv.xyz
    - \* icethk.xyz
  - BAS
    - \* bedelv.xyz
  - INGV
    - \* bedelv.xyz
  - IceBridge
    - \* bedelv.xyz
    - \* icethk.xyz
  - Lakes
    - \* oia-lakes.csv
  - OIA compilation
    - \* bedelv.xyz\_val.grd
    - \* icethk.xyz\_val.grd
  - OIA\_focused
    - \* icethk.xyz
    - \* roughness\_dev\_0400.xyz
    - \* roughness\_dev\_0400.xyz\_val.grd
    - \* roughness\_dev\_0800.xyz
    - \* roughness\_dev\_0800.xyz\_val.grd
    - \* roughness\_dev\_1600.xyz

- \* roughness\_dev\_1600.xyz\_val.gradient.grd
- OIA\_ice\_surface
  - \* .DS\_Store
  - \* oia\_local\_srfelv.pdf
  - \* srfelv-las.xyz
- README.txt
- Survey Plan
  - \* F11.kml
  - \* F12.kml
  - \* F13.kml
  - \* F14.kml
  - \* Survey Plan.png

The copyright of individual parts of the supplement might differ from the CC BY 3.0 License.
