# Supplementary figures and images for: High-resolution boundary conditions of an old ice target near Dome C, Antarctica
Source: Copernicus journal article supplement (doi:10.5194/tc-11-1897-2017), 2017-08-14

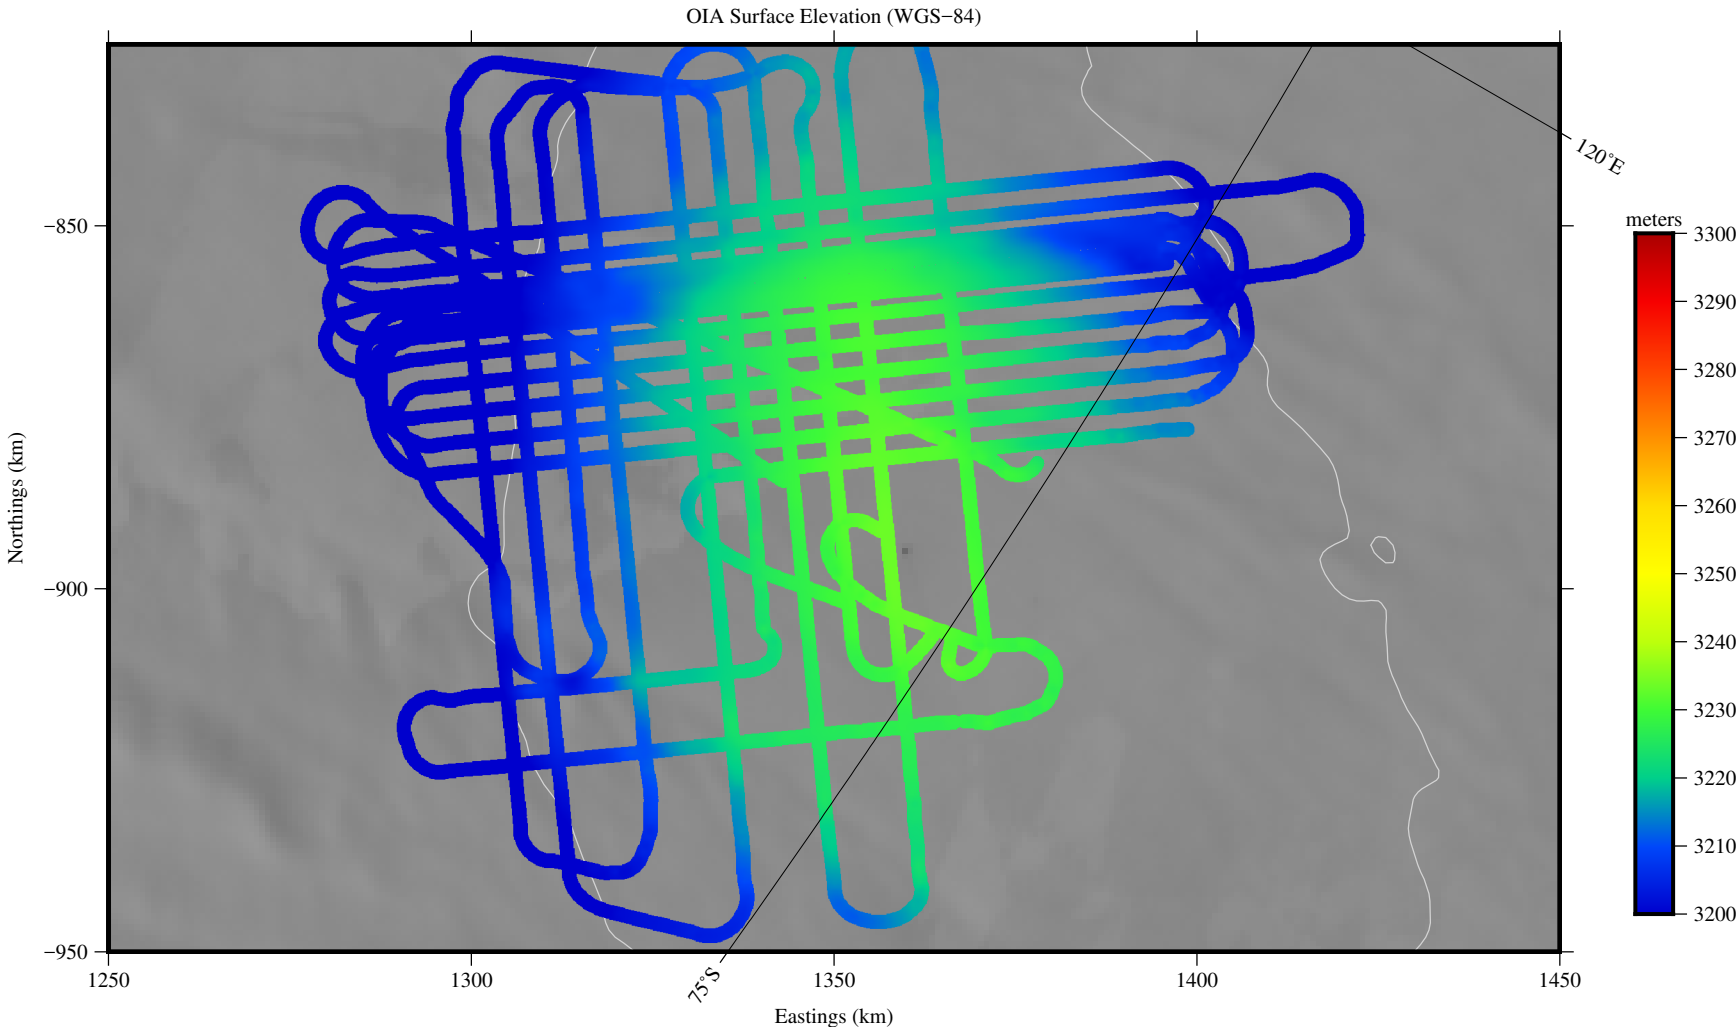

Supplement: Supplementary file 1 [file tc-11-1897-2017-supplement.zip]
